# Supplementary material for: Plasma nanoDSF Denaturation Profile at Baseline Is Predictive of Glioblastoma EGFR Status
Source: MDPI journal article supplement (doi:10.3390/cancers15030760), 2023-01-26

## Supplementary data

### *Data pre-processing*

Raw data from the nanoDSF instrument (F330, F350, A350, F330/F350 ratio, and their respective derivatives) were interpolated using InterpolatedUnivariateSpline from the scipy.interpolate python module in order to ensure the same temperature alignment for all data.

### *Machine Learning*

The Machine Learning code developed for this work uses the scikit-learn toolbox with : (1) LogisticRegression from the linear\_model module with parameter max\_iter sets to 1000; (2) SVC from the svm module with the following combination of parameters: kernel = "poly", gamma = "auto", C = 1, degree = 3; (3) RandomForestClassifier from the ensemble module with parameter n\_estimators fixed to 500; (4) AdaBoostClassifier from the module ensemble with the default parameter values except n\_estimators = 100. The code and the data used for EGFR amplification detection is publicly available at [https://github.com/RemiEyraud/EGFR\\_amplification\\_detection](https://github.com/RemiEyraud/EGFR_amplification_detection)

## Additional Plots

Figure S1: Means of nanoDSF output.

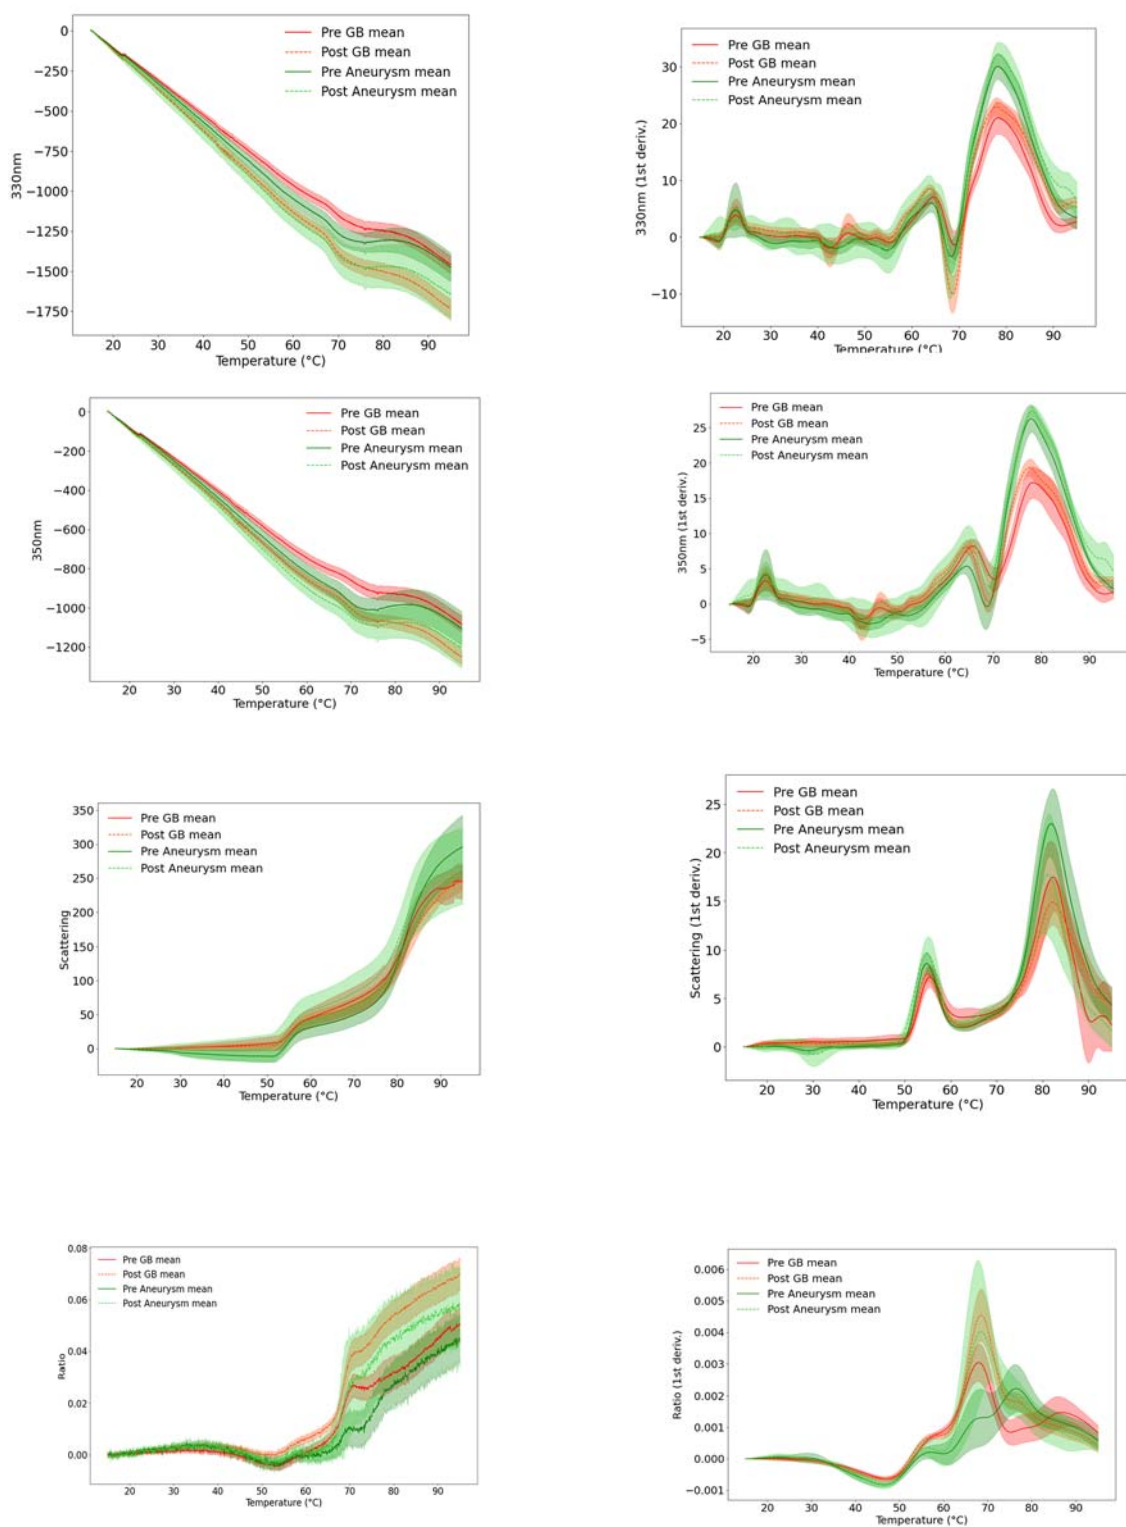

Supplement: s1 [file s1]
